# Supplementary material for: A structure–activity relationship study of the toxicity of ionic liquids using an adapted Ferreira–Kiralj hydrophobicity parameter
Source: Royal Society of Chemistry journal article supplement (doi:10.1039/c4cp04142a), 2015-01-01
Supplement: c4cp04142a1.pdf [file c4cp04142a1.pdf]

SUPPLEMENTARY INFORMATION

A STRUCTURE-ACTIVITY RELATIONSHIP STUDY OF THE TOXICITY OF IONIC LIQUIDS USING AN ADAPTED FERREIRA-KIRALJ  
HYDROPHOBICITY PARAMETER.

Eduardo Borges de Melo

Theoretical Medicinal and Environmental Chemistry Laboratory (LQMAT), Dept. of Pharmacy, Western Paraná State University (UNIOESTE), 2069

Universitária St, 85819110, Cascavel, Paraná, Brazil. E-mail: [eduardo.b.de.melo@gmail.com](mailto:eduardo.b.de.melo@gmail.com). Tel: +55-45-3220-3256.

**Table S1.** SMILES strings, Chemical Abstracts Service (CAS) code and LogEC<sub>50</sub> for each sample of dataset

| Samples | SMILES                                                           | CAS         | LogEC <sub>50</sub> |
|---------|------------------------------------------------------------------|-------------|---------------------|
| 1       | [Cl-].CCCCCCCC[N+]1=CN(C)C=C1                                    | 64697-40-1  | 2                   |
| 2       | CCCCN1C=C[N+](=C1)C.[Cl-]                                        | 79917-90-1  | 3.55                |
| 3       | [Cl-].C[n+]1ccn(CCCCCCCCCCCCCC)c1                                | 61546-01-8  | -0.24               |
| 4       | [N+]1(C)=CN(C=C1)CCCC.[Cl-]                                      | 171058-22-3 | 3.16                |
| 5       | [N+]1(C)=CN(C=C1)CCCCCC.[Cl-]                                    | 581101-92-0 | 2.53                |
| 6       | [N+]1(C)=CN(C=C1)CCCCCCCC.[Cl-]                                  | 171058-20-1 | 1.4                 |
| 7       | [N+]1(C)=CN(C=C1)CCCC.[Br-]                                      | 85100-77-2  | 3.43                |
| 8       | [N+]1(CC)=CN(C=C1)CCCC.[Br-]                                     | 547719-00-6 | 2                   |
| 9       | [N+]1(C)=CN(C=C1)CCCC.[I-]                                       | 65039-05-6  | 3.48                |
| 10      | [N+]1(CC)=CN(C=C1)CCCC.[B-](F)(F)(F)F                            | 393550-29-3 | 2.26                |
| 11      | [N+]1(C)=CN(C=C1)CC.[B-](F)(F)(F)F                               | 143314-16-3 | 3.44                |
| 12      | [N+]1(C)=CN(C=C1)CCCCCC.[B-](F)(F)(F)F                           | 244193-52-0 | 1.59                |
| 13      | [N+]1(C)=CN(C=C1)CCC.[B-](F)(F)(F)F                              | 244193-48-4 | 3.45                |
| 14      | [N+]1(C)=CN(C=C1)CCCCCCCCO.[Br-]                                 | 952429-65-1 | 2.36                |
| 15      | [N+]1(C)=CN(C=C1)Cc1ccc(cc1)C.[Cl-]                              | 637348-60-8 | 2.64                |
| 16      | [N+]1(C)=C(C)N(C=C1)CCCC.[B-](F)(F)(F)F                          | 384347-21-1 | 1.9                 |
| 17      | [N+]1(C)=CN(C=C1)Cc1cccc1.[B-](F)(F)(F)F                         | 500996-04-3 | 2.97                |
| 18      | [N+]1(C)=CN(C=C1)COCC.[Cl-]                                      | 945996-02-1 | 3.6                 |
| 19      | [N+]1(C)=CN(C=C1)CC.[O-]C(=O)C                                   | 143314-17-4 | 4.23                |
| 20      | [N+]1(C)=CN(C=C1)CCCC.[O-]S(=O)(=O)OCCOCCOC                      | 595565-54-1 | 3.15                |
| 21      | [N+]1(C)=CN(C=C1)CC.[O-]S(=O)(=O)C(F)(F)F                        | 145022-44-2 | 4.09                |
| 22      | [N+]1(C)=CN(C=C1)CCCC.[N-](S(=O)(=O)C(F)(F)F)S(=O)(=O)C(F)(F)F   | 174899-83-3 | 2.68                |
| 23      | [N+]1(C)=CN(C=C1)CCCCCC.[N-](S(=O)(=O)C(F)(F)F)S(=O)(=O)C(F)(F)F | 178631-04-4 | 1.64                |
| 24      | [N+]1(C)=CN(C=C1)CC.[O-]C(=O)C(F)(F)F                            | 174899-65-1 | 4                   |
| 25      | [N+]1(C)=CN(C=C1)CC.[O-]S(=O)(=O)C                               | 145022-45-3 | 3.97                |
| 26      | [n+]1(ccccc1)CCCC.[B-](F)(F)(F)F                                 | 203389-28-0 | 3.16                |
| 27      | [n+]1(ccc(C)cc1)CCCC.[Cl-]                                       | 112400-86-9 | 3.32                |
| 28      | [N+]1(C)(CCCC1)CCCC.[Cl-]                                        | 909398-59-0 | 2.93                |
| 29      | [N+]1(C)(CCCC1)CCCCCCCC.[Cl-]                                    | 909398-60-3 | 2.59                |
| 30      | [N+]1(C)(CCCC1)CCCC.[N-](S(=O)(=O)C(F)(F)F)S(=O)(=O)C(F)(F)F     | 380497-19-8 | 2.56                |
| 31      | [n+]1(ccccc1)CCCC.[O-]S(=O)(=O)OC                                | 885456-20-2 | 3.92                |
| 32      | [n+]1(ccccc1)CCCC.[Br-]                                          | 874-80-6    | 3.9                 |

|    |                                                                   |              |      |
|----|-------------------------------------------------------------------|--------------|------|
| 33 | [n+]1(cc(C)ccc1)CCCC.[B-](F)(F)(F)F                               | 597581-48-1  | 3.3  |
| 34 | [n+]1(ccccc1)CCCC.[O-]S(=O)(=O)C(F)(F)F                           | 390423-43-5  | 3.66 |
| 35 | [n+]1(ccccc1)CCCCC.[O-]S(=O)(=O)C(F)(F)F                          | 623167-81-7  | 2.54 |
| 36 | [n+]1(ccccc1)CCCC.[Cl-]                                           | 1124-64-7    | 3.77 |
| 37 | [n+]1(cc(C)ccc1)CCCCC.[Cl-]                                       | 916730-40-0  | 2.4  |
| 38 | [n+]1(ccc(C)cc1)CCCCC.[Cl-]                                       | 62409-49-8   | 2.67 |
| 39 | [n+]1(ccc(C)cc1)CCCCC.[B-](F)(F)(F)F                              | 952429-73-1  | 2.17 |
| 40 | [n+]1(ccccc1)CCO.[I-]                                             | 69095-13-2   | 4.16 |
| 41 | [n+]1(ccccc1)COCC.[Cl-]                                           | 21379-36-2   | 3.32 |
| 42 | [n+]1(c(C)cccc1)CCCC.[B-](F)(F)(F)F                               | 286453-46-1  | 3.25 |
| 43 | [n+]1(ccc(C)cc1)CCCCC.[B-](F)(F)(F)F                              | 936239-96-2  | 1.49 |
| 44 | [n+]1(cc(C)c(C)cc1)CCCC.[B-](F)(F)(F)F                            | 952429-71-9  | 3.02 |
| 45 | [n+]1(ccccc1)CCCC.[N-](S(=O)(=O)C(F)(F)F)S(=O)(=O)C(F)(F)F        | 890532-45-3  | 2.85 |
| 46 | [n+]1(ccccc1)CCC.[N-](S(=O)(=O)C(F)(F)F)S(=O)(=O)C(F)(F)F         | 1104525-90-7 | 3.2  |
| 47 | [n+]1(ccccc1)CCCC.[Br-]                                           | 53385-72-1   | 3.15 |
| 48 | [n+]1(c(C)cccc1)CCCC.[Cl-]                                        | 112400-85-8  | 3.75 |
| 49 | [N+]1(C)(CCCC1)CC(=O)OCC.[Br-]                                    | 129412-64-2  | 3.83 |
| 50 | [N+]1(C)(CCCC1)CC(=O)OCC.[N-](S(=O)(=O)C(F)(F)F)S(=O)(=O)C(F)(F)F | 1107545-20-9 | 3.59 |
| 51 | [n+]1(ccccc1)CCCOC.[N-](S(=O)(=O)C(F)(F)F)S(=O)(=O)C(F)(F)F       | 1049752-00-2 | 3.38 |
| 52 | [N+]1(C)(CCCC1)CCCO.[N-](S(=O)(=O)C(F)(F)F)S(=O)(=O)C(F)(F)F      | 1049751-96-3 | 3.62 |
| 53 | [N+]1(C)(CCCC1)CCCOC.[Cl-]                                        | 1012794-04-5 | 4.4  |
| 54 | [n+]1(ccccc1)CCOCC.[N-](S(=O)(=O)C(F)(F)F)S(=O)(=O)C(F)(F)F       | 849418-12-8  | 3.26 |
| 55 | [N+](C)(C)(Cc1cccc1)CCCCCCCCCCCC.[Cl-]                            | 139-08-2     | 0.16 |
| 56 | [n+]1(cccc2cccc12)CCCC.[B-](F)(F)(F)F                             | 952429-68-4  | 2.16 |
| 57 | [n+]1(cccc2cccc12)CCCC.[Br-]                                      | 31537-79-8   | 2.32 |
| 58 | [N+]1(C)(CCOCC1)CC.[O-]S(=O)(=O)c1ccc(C)cc1                       | 445497-25-6  | 3.81 |
| 59 | [N+]1(C)(CCOCC1)COCC.[N-](S(=O)(=O)C(F)(F)F)S(=O)(=O)C(F)(F)F     | 1049751-90-7 | 3.36 |
| 60 | [N+]1(C)(CCOCC1)CCOC.[N-](S(=O)(=O)C(F)(F)F)S(=O)(=O)C(F)(F)F     | 796039-07-1  | 3.81 |
| 61 | [N+]1(C)(CCOCC1)CCCOC.[N-](S(=O)(=O)C(F)(F)F)S(=O)(=O)C(F)(F)F    | 1049751-91-8 | 3.77 |
| 62 | [N+]1(C)(CCOCC1)CCCO.[N-](S(=O)(=O)C(F)(F)F)S(=O)(=O)C(F)(F)F     | 1026019-24-8 | 3.53 |
| 63 | [N+]1(C)(CCOCC1)CCOCC.[N-](S(=O)(=O)C(F)(F)F)S(=O)(=O)C(F)(F)F    | 663628-48-6  | 3.69 |
| 64 | [N+]1(C)(CCOCC1)CCCC.[N-](S(=O)(=O)C(F)(F)F)S(=O)(=O)C(F)(F)F     | 324574-95-0  | 3.43 |
| 65 | [N+]1(C)(CCCC1)CCC.[N-](S(=O)(=O)C(F)(F)F)S(=O)(=O)C(F)(F)F       | 608140-12-1  | 3.16 |
| 66 | [N+]1(C)(CCCC1)CCCOC.[N-](S(=O)(=O)C(F)(F)F)S(=O)(=O)C(F)(F)F     | 1049751-95-2 | 3.27 |

|     |                                                                 |                |      |
|-----|-----------------------------------------------------------------|----------------|------|
| 67  | [N+]1(C)(CCCCC1)CCOC.[N-](S(=O)(=O)C(F)(F)F)S(=O)(=O)C(F)(F)F   | 873583-83-6    | 3.25 |
| 68  | [N+]1(C)(CCCCC1)CCCC.[N-](S(=O)(=O)C(F)(F)F)S(=O)(=O)C(F)(F)F   | 623580-02-9    | 3.41 |
| 69  | [N+]1(C)(CCCCC1)COCC.[N-](S(=O)(=O)C(F)(F)F)S(=O)(=O)C(F)(F)F   | 1049751-93-0   | 3.41 |
| 70  | [N+]1(C)(CCCCC1)CCCO.[N-](S(=O)(=O)C(F)(F)F)S(=O)(=O)C(F)(F)F   | 1049751-96-3   | 3.6  |
| 71  | [N+]1(C)(CCCCC1)CCOCC.[N-](S(=O)(=O)C(F)(F)F)S(=O)(=O)C(F)(F)F  | 663628-45-3    | 3.34 |
| 72  | [N+]1(C)(CCCCC1)CCO.[N-](S(=O)(=O)C(F)(F)F)S(=O)(=O)C(F)(F)F    | 757212-03-6    | 3.65 |
| 73  | N#CC[N+]1(C)CCCCC1.FC(F)(F)S(=O)(=O)[N-]S(=O)(=O)C(F)(F)F       | <b>sem CAS</b> | 3.95 |
| 74  | [N+]1(C)(CCCCC1)COCC.[Cl-]                                      | 1012794-08-9   | 4.24 |
| 75  | [N+]1(C)(CCCCC1)CCCOC.[Cl-]                                     | 1012794-04-5   | 4.4  |
| 76  | [N+]1(C)(CCCCC1)CCO.[I-]                                        | 67889-35-4     | 4.58 |
| 77  | [n+]1(ccccc1)CCCCC.[Cl-]                                        | 6220-15-1      | 2.8  |
| 78  | [n+]1(ccccc1)CC#N.[N-](S(=O)(=O)C(F)(F)F)S(=O)(=O)C(F)(F)F      | 1017553-46-6   | 3.51 |
| 79  | [n+]1(ccccc1)CC#N.[Cl-]                                         | 17281-59-3     | 3.79 |
| 80  | [N+]1(C)(CCCCC1)CCCC.[Br-]                                      | 94280-72-5     | 4.03 |
| 81  | [N+]1(C)=CN(C=C1)CCCCCCCC.[Cl-]                                 | 171058-18-7    | 1.34 |
| 82  | [N+]1(C)=CN(C=C1)CCCCC.[Cl-]                                    | 171058-17-6    | 2.82 |
| 83  | [N+]1(C)=CN(C=C1)CC.[Cl-]                                       | 65039-09-0     | 3.86 |
| 84  | [N+]1(C)=CN(C=C1)CCCCCCCC.[B-](F)(F)(F)F                        | 244193-55-3    | 1.65 |
| 85  | [N+]1(C)=CN(C=C1)CCCC.[B-](F)(F)(F)F                            | 244193-49-5    | 3.09 |
| 86  | [N+]1(CC)=CN(C=C1)CCCC.[B-](F)(F)(F)F                           | 581101-91-9    | 3.26 |
| 87  | [N+]1(C)=CN(C=C1)CCCC.[O-]S(=O)(=O)C(F)(F)F                     | 174899-66-2    | 3    |
| 88  | [N+]1(C)=CN(C=C1)CCCCC.[N-](S(=O)(=O)C(F)(F)F)S(=O)(=O)C(F)(F)F | 382150-50-7    | 2.24 |
| 89  | [N+]1(C)=CN(C=C1)CCCC.[N-](C(F)(F)F)C(F)(F)F                    | 710336-91-7    | 2.18 |
| 90  | [N+]1(C)=CN(C=C1)CC.[O-]S(=O)(=O)OC                             | 516474-01-4    | 4.2  |
| 91  | [n+]1(ccc(C)cc1)CCCCCCC.[Cl-]                                   | 141645-91-2    | 2.97 |
| 92  | [n+]1(ccccc1)CC.[Cl-]                                           | 2294-38-4      | 4.22 |
| 93  | [N+]1(C)(CCCCC1)CC#N.[Cl-]                                      | 194986-67-9    | 4.58 |
| 94  | [N+](C)(C)(Cc1cccc1)CCCCCCCC.[Cl-]                              | 965-32-2       | 0.65 |
| 95  | [n+]1(cccc2cccc12)CCCCC.[B-](F)(F)(F)F                          | 952429-69-5    | 1.07 |
| 96  | [N+]1(C)(CCOCC1)CC#N.[N-](S(=O)(=O)C(F)(F)F)S(=O)(=O)C(F)(F)F   | 1040381-03-0   | 3.53 |
| 97  | [N+]1(C)=CN(C=C1)CCCOC.[N-](S(=O)(=O)C(F)(F)F)S(=O)(=O)C(F)(F)F | 1015254-36-0   | 3.34 |
| 98  | [N+]1(C)(CCCC1)CC#N.[N-](S(=O)(=O)C(F)(F)F)S(=O)(=O)C(F)(F)F    | 1017553-47-7   | 3.81 |
| 99  | [N+]1(C)(CCCC1)CCCCC.[Cl-]                                      | 909398-59-0    | 1.63 |
| 100 | [N+]1(C)=CN(C=C1)CCCC.[B-](F)(F)(F)F                            | 174501-65-6    | 3.11 |

**Table S2.** Molecular descriptors used in this study.

| Sample | apol   | nAromBond | nAtom | nHeavyAtom | nH | nC | nO | nS | nBonds | nBonds2 | nBondsS | nBondsS2 | C2SP2 | C1SP3 | C2SP3 | CrippenMR | fragC | nHBAcc | nHBAcc_<br>Lipinski | nAtomLC | nAtomLAC | nRotB | TopoPSA | VABC    | VAdjMat |
|--------|--------|-----------|-------|------------|----|----|----|----|--------|---------|---------|----------|-------|-------|-------|-----------|-------|--------|---------------------|---------|----------|-------|---------|---------|---------|
| 1      | 40.836 | 5         | 38    | 15         | 23 | 12 | 0  | 0  | 14     | 37      | 37      | 32       | 0     | 2     | 6     | 63.268    | 14.03 | 1      | 2                   | 8       | 8        | 7     | 8.81    | 233.34  | 4.907   |
| 2      | 28.462 | 5         | 26    | 11         | 15 | 8  | 0  | 0  | 10     | 25      | 25      | 20       | 0     | 2     | 2     | 44.8      | 10.03 | 1      | 2                   | 4       | 4        | 3     | 8.81    | 164.156 | 4.459   |
| 3      | 66.252 | 0         | 63    | 23         | 40 | 20 | 0  | 0  | 22     | 62      | 60      | 60       | 0     | 2     | 14    | 99.428    | 22.03 | 1      | 2                   | 16      | 16       | 15    | 4.44    | 383.926 | 5.524   |
| 4      | 31.555 | 5         | 29    | 12         | 17 | 9  | 0  | 0  | 11     | 28      | 28      | 23       | 0     | 2     | 3     | 49.417    | 11.03 | 1      | 2                   | 5       | 5        | 4     | 8.81    | 181.452 | 4.585   |
| 5      | 37.743 | 5         | 35    | 14         | 21 | 11 | 0  | 0  | 13     | 34      | 34      | 29       | 0     | 2     | 5     | 58.651    | 13.03 | 1      | 2                   | 7       | 7        | 6     | 8.81    | 216.044 | 4.807   |
| 6      | 43.93  | 5         | 41    | 16         | 25 | 13 | 0  | 0  | 15     | 40      | 40      | 35       | 0     | 2     | 7     | 67.885    | 15.03 | 1      | 2                   | 9       | 9        | 8     | 8.81    | 250.636 | 5       |
| 7      | 29.332 | 5         | 26    | 11         | 15 | 8  | 0  | 0  | 10     | 25      | 25      | 20       | 0     | 2     | 2     | 44.8      | 10.03 | 1      | 2                   | 4       | 4        | 3     | 8.81    | 168.229 | 4.459   |
| 8      | 38.613 | 5         | 35    | 14         | 21 | 11 | 0  | 0  | 13     | 34      | 34      | 29       | 0     | 4     | 4     | 58.727    | 13.03 | 1      | 2                   | 6       | 6        | 6     | 8.81    | 220.117 | 4.807   |
| 9      | 31.632 | 5         | 26    | 11         | 15 | 8  | 0  | 0  | 10     | 25      | 25      | 20       | 0     | 2     | 2     | 44.8      | 10.03 | 1      | 2                   | 4       | 4        | 3     | 8.81    | 174.222 | 4.459   |
| 10     | 40.821 | 5         | 39    | 18         | 21 | 11 | 0  | 0  | 17     | 38      | 38      | 33       | 0     | 4     | 4     | 68.913    | 17.07 | 1      | 2                   | 6       | 6        | 6     | 8.81    | 263.618 | 5.17    |
| 11     | 25.353 | 5         | 24    | 13         | 11 | 6  | 0  | 0  | 12     | 23      | 23      | 18       | 0     | 2     | 0     | 45.752    | 12.07 | 1      | 2                   | 5       | 0        | 1     | 8.81    | 177.138 | 4.7     |
| 12     | 43.914 | 5         | 42    | 19         | 23 | 12 | 0  | 0  | 18     | 41      | 41      | 36       | 0     | 2     | 6     | 73.454    | 18.07 | 1      | 2                   | 8       | 8        | 7     | 8.81    | 280.914 | 5.248   |
| 13     | 28.446 | 5         | 27    | 14         | 13 | 7  | 0  | 0  | 13     | 26      | 26      | 21       | 0     | 2     | 1     | 50.369    | 13.07 | 1      | 2                   | 5       | 3        | 2     | 8.81    | 194.434 | 4.807   |
| 14     | 42.508 | 5         | 39    | 16         | 23 | 12 | 1  | 0  | 15     | 38      | 38      | 33       | 0     | 2     | 6     | 63.639    | 15.04 | 2      | 3                   | 9       | 8        | 8     | 29.04   | 246.203 | 5       |
| 15     | 35.502 | 11        | 30    | 15         | 15 | 12 | 0  | 0  | 15     | 30      | 30      | 19       | 4     | 2     | 0     | 57.014    | 15.03 | 1      | 2                   | 0       | 0        | 2     | 8.81    | 202.174 | 4.907   |
| 16     | 40.821 | 5         | 39    | 18         | 21 | 11 | 0  | 0  | 17     | 38      | 38      | 33       | 0     | 3     | 4     | 67.86     | 17.07 | 1      | 2                   | 6       | 6        | 5     | 8.81    | 263.618 | 5.17    |
| 17     | 35.486 | 11        | 31    | 18         | 13 | 11 | 0  | 0  | 18     | 31      | 31      | 20       | 5     | 1     | 0     | 63.56     | 18.07 | 1      | 2                   | 5       | 0        | 2     | 8.81    | 232.452 | 5.17    |
| 18     | 26.17  | 5         | 24    | 11         | 13 | 7  | 1  | 0  | 10     | 23      | 23      | 18       | 0     | 2     | 0     | 41.028    | 10.04 | 2      | 3                   | 4       | 0        | 3     | 18.04   | 155.65  | 4.459   |
| 19     | 27.219 | 5         | 26    | 12         | 14 | 8  | 2  | 0  | 11     | 25      | 24      | 19       | 0     | 3     | 0     | 49.49     | 11.04 | 3      | 4                   | 4       | 0        | 1     | 48.94   | 163.889 | 4.585   |
| 20     | 50.129 | 5         | 48    | 22         | 26 | 13 | 6  | 1  | 21     | 47      | 45      | 40       | 0     | 6     | 2     | 76.284    | 21.09 | 7      | 8                   | 12      | 4        | 10    | 102.08  | 306.675 | 5.459   |
| 21     | 28.832 | 5         | 27    | 16         | 11 | 7  | 3  | 1  | 15     | 26      | 24      | 19       | 0     | 2     | 0     | 44.458    | 15.09 | 4      | 5                   | 8       | 0        | 2     | 74.39   | 194.731 | 5       |
| 22     | 43.252 | 5         | 40    | 25         | 15 | 10 | 4  | 2  | 24     | 39      | 35      | 30       | 0     | 2     | 2     | 78.197    | 24.15 | 6      | 7                   | 15      | 4        | 7     | 93.85   | 303.118 | 5.644   |
| 23     | 55.626 | 5         | 52    | 29         | 23 | 14 | 4  | 2  | 28     | 51      | 47      | 42       | 0     | 2     | 6     | 96.665    | 28.15 | 6      | 7                   | 15      | 8        | 11    | 93.85   | 372.302 | 5.858   |
| 24     | 26.89  | 5         | 26    | 15         | 11 | 8  | 2  | 0  | 14     | 25      | 24      | 19       | 0     | 3     | 0     | 49.871    | 14.07 | 3      | 4                   | 7       | 2        | 2     | 48.94   | 182.092 | 4.907   |
| 25     | 29.161 | 5         | 27    | 13         | 14 | 7  | 3  | 1  | 12     | 26      | 24      | 19       | 0     | 2     | 0     | 44.327    | 12.06 | 4      | 5                   | 5       | 0        | 1     | 74.39   | 176.529 | 4.7     |
| 26     | 31.533 | 6         | 29    | 15         | 14 | 9  | 0  | 0  | 14     | 28      | 28      | 22       | 3     | 2     | 2     | 54.974    | 14.06 | 0      | 1                   | 5       | 4        | 3     | 3.88    | 215.393 | 4.907   |
| 27     | 31.549 | 6         | 28    | 12         | 16 | 10 | 0  | 0  | 11     | 27      | 27      | 21       | 2     | 3     | 2     | 48.428    | 11.02 | 0      | 1                   | 4       | 4        | 3     | 3.88    | 185.115 | 4.585   |
| 28     | 38.643 | 0         | 37    | 13         | 24 | 11 | 0  | 0  | 12     | 36      | 36      | 36       | 0     | 4     | 6     | 54.161    | 12.02 | 0      | 1                   | 6       | 6        | 5     | 0       | 221.22  | 4.7     |
| 29     | 44.83  | 0         | 43    | 15         | 28 | 13 | 0  | 0  | 14     | 42      | 42      | 42       | 0     | 4     | 8     | 63.395    | 14.02 | 0      | 1                   | 8       | 8        | 7     | 0       | 255.812 | 4.907   |
| 30     | 53.433 | 0         | 51    | 27         | 24 | 13 | 4  | 2  | 26     | 50      | 46      | 46       | 0     | 4     | 6     | 87.558    | 26.14 | 5      | 6                   | 15      | 6        | 9     | 85.04   | 360.182 | 5.755   |

|    |        |    |    |    |    |    |   |   |    |    |    |    |   |   |    |         |       |   |   |    |    |    |        |         |       |
|----|--------|----|----|----|----|----|---|---|----|----|----|----|---|---|----|---------|-------|---|---|----|----|----|--------|---------|-------|
| 31 | 36.143 | 6  | 33 | 16 | 17 | 10 | 4 | 1 | 15 | 32 | 30 | 24 | 3 | 2 | 2  | 54.634  | 15.06 | 4 | 5 | 6  | 4  | 4  | 78.69  | 223.574 | 5     |
| 32 | 29.325 | 6  | 25 | 11 | 14 | 9  | 0 | 0 | 10 | 24 | 24 | 18 | 3 | 2 | 2  | 44.788  | 10.02 | 0 | 1 | 4  | 4  | 3  | 3.88   | 171.891 | 4.459 |
| 33 | 34.627 | 6  | 32 | 16 | 16 | 10 | 0 | 0 | 15 | 31 | 31 | 25 | 2 | 3 | 2  | 58.614  | 15.06 | 0 | 1 | 5  | 4  | 3  | 3.88   | 232.689 | 5     |
| 34 | 35.012 | 6  | 32 | 18 | 14 | 10 | 3 | 1 | 17 | 31 | 29 | 23 | 3 | 2 | 2  | 53.68   | 17.08 | 3 | 4 | 8  | 4  | 4  | 69.46  | 232.986 | 5.17  |
| 35 | 41.199 | 6  | 38 | 20 | 18 | 12 | 3 | 1 | 19 | 37 | 35 | 29 | 3 | 2 | 4  | 62.914  | 19.08 | 3 | 4 | 8  | 6  | 6  | 69.46  | 267.578 | 5.322 |
| 36 | 28.455 | 6  | 25 | 11 | 14 | 9  | 0 | 0 | 10 | 24 | 24 | 18 | 3 | 2 | 2  | 44.788  | 10.02 | 0 | 1 | 4  | 4  | 3  | 3.88   | 167.819 | 4.459 |
| 37 | 37.736 | 6  | 34 | 14 | 20 | 12 | 0 | 0 | 13 | 33 | 33 | 27 | 2 | 3 | 4  | 57.662  | 13.02 | 0 | 1 | 6  | 6  | 5  | 3.88   | 219.707 | 4.807 |
| 38 | 37.736 | 6  | 34 | 14 | 20 | 12 | 0 | 0 | 13 | 33 | 33 | 27 | 2 | 3 | 4  | 57.662  | 13.02 | 0 | 1 | 6  | 6  | 5  | 3.88   | 219.707 | 4.807 |
| 39 | 40.814 | 6  | 38 | 18 | 20 | 12 | 0 | 0 | 17 | 37 | 37 | 31 | 2 | 3 | 4  | 67.848  | 17.06 | 0 | 1 | 6  | 6  | 5  | 3.88   | 267.281 | 5.17  |
| 40 | 26.24  | 6  | 20 | 10 | 10 | 7  | 1 | 0 | 9  | 19 | 19 | 13 | 3 | 2 | 0  | 33.723  | 9.03  | 1 | 2 | 3  | 2  | 2  | 24.11  | 152.083 | 4.322 |
| 41 | 26.164 | 6  | 23 | 11 | 12 | 8  | 1 | 0 | 10 | 22 | 22 | 16 | 3 | 2 | 0  | 41.016  | 10.03 | 1 | 2 | 4  | 0  | 3  | 13.11  | 159.313 | 4.459 |
| 42 | 34.627 | 6  | 32 | 16 | 16 | 10 | 0 | 0 | 15 | 31 | 31 | 25 | 4 | 3 | 2  | 58.614  | 15.06 | 0 | 1 | 5  | 4  | 3  | 3.88   | 232.689 | 5     |
| 43 | 47.001 | 6  | 44 | 20 | 24 | 14 | 0 | 0 | 19 | 43 | 43 | 37 | 2 | 3 | 6  | 77.082  | 19.06 | 0 | 1 | 8  | 8  | 7  | 3.88   | 301.873 | 5.322 |
| 44 | 37.72  | 6  | 35 | 17 | 18 | 11 | 0 | 0 | 16 | 34 | 34 | 28 | 1 | 4 | 2  | 62.254  | 16.06 | 0 | 1 | 5  | 4  | 3  | 3.88   | 249.985 | 5.087 |
| 45 | 46.339 | 6  | 42 | 26 | 16 | 12 | 4 | 2 | 25 | 41 | 37 | 31 | 3 | 2 | 3  | 82.802  | 25.14 | 5 | 6 | 15 | 5  | 8  | 88.92  | 324.077 | 5.7   |
| 46 | 40.152 | 6  | 36 | 24 | 12 | 10 | 4 | 2 | 23 | 35 | 31 | 25 | 3 | 2 | 1  | 73.568  | 23.14 | 5 | 6 | 15 | 3  | 6  | 88.92  | 289.485 | 5.585 |
| 47 | 32.419 | 6  | 28 | 12 | 16 | 10 | 0 | 0 | 11 | 27 | 27 | 21 | 3 | 2 | 3  | 49.405  | 11.02 | 0 | 1 | 5  | 5  | 4  | 3.88   | 189.187 | 4.585 |
| 48 | 31.549 | 6  | 28 | 12 | 16 | 10 | 0 | 0 | 11 | 27 | 27 | 21 | 4 | 3 | 2  | 48.428  | 11.02 | 0 | 1 | 4  | 4  | 3  | 3.88   | 185.115 | 4.585 |
| 49 | 33.596 | 0  | 31 | 13 | 18 | 9  | 2 | 0 | 12 | 30 | 29 | 29 | 0 | 5 | 2  | 49.895  | 12.04 | 2 | 3 | 6  | 2  | 4  | 26.3   | 205.645 | 4.7   |
| 50 | 47.516 | 0  | 45 | 27 | 18 | 11 | 6 | 2 | 26 | 44 | 39 | 39 | 0 | 5 | 2  | 83.292  | 26.16 | 7 | 8 | 15 | 2  | 8  | 111.34 | 340.534 | 5.755 |
| 51 | 44.047 | 6  | 40 | 26 | 14 | 11 | 5 | 2 | 25 | 39 | 35 | 29 | 3 | 2 | 1  | 76.527  | 25.15 | 6 | 7 | 15 | 3  | 8  | 98.15  | 315.571 | 5.7   |
| 52 | 48.048 | 0  | 46 | 26 | 20 | 11 | 5 | 2 | 25 | 45 | 41 | 41 | 0 | 4 | 4  | 79.736  | 25.15 | 6 | 7 | 15 | 3  | 7  | 105.27 | 334.38  | 5.7   |
| 53 | 36.351 | 0  | 35 | 13 | 22 | 10 | 1 | 0 | 12 | 34 | 34 | 34 | 0 | 4 | 4  | 51.129  | 12.03 | 1 | 2 | 5  | 3  | 4  | 9.23   | 212.714 | 4.7   |
| 54 | 44.047 | 6  | 40 | 26 | 14 | 11 | 5 | 2 | 25 | 39 | 35 | 29 | 3 | 4 | 0  | 76.527  | 25.15 | 6 | 7 | 15 | 2  | 8  | 98.15  | 315.571 | 5.7   |
| 55 | 71.765 | 6  | 67 | 25 | 42 | 23 | 0 | 0 | 24 | 66 | 66 | 60 | 5 | 3 | 12 | 107.443 | 24.02 | 0 | 1 | 18 | 14 | 15 | 0      | 409.963 | 5.644 |
| 56 | 39.907 | 11 | 35 | 19 | 16 | 13 | 0 | 0 | 19 | 35 | 35 | 24 | 7 | 2 | 2  | 72.48   | 19.06 | 0 | 1 | 5  | 4  | 3  | 3.88   | 256.047 | 5.248 |
| 57 | 37.699 | 11 | 31 | 15 | 16 | 13 | 0 | 0 | 15 | 31 | 31 | 20 | 7 | 2 | 2  | 62.294  | 15.02 | 0 | 1 | 4  | 4  | 3  | 3.88   | 212.546 | 4.907 |
| 58 | 47.184 | 6  | 43 | 20 | 23 | 14 | 4 | 1 | 20 | 43 | 41 | 35 | 5 | 7 | 0  | 71.02   | 20.06 | 4 | 5 | 4  | 0  | 2  | 74.81  | 280.401 | 5.322 |
| 59 | 45.756 | 0  | 44 | 26 | 18 | 10 | 6 | 2 | 25 | 43 | 39 | 39 | 0 | 6 | 0  | 76.627  | 25.16 | 7 | 8 | 15 | 0  | 7  | 103.5  | 325.875 | 5.7   |
| 60 | 45.756 | 0  | 44 | 26 | 18 | 10 | 6 | 2 | 25 | 43 | 39 | 39 | 0 | 6 | 0  | 76.877  | 25.16 | 7 | 8 | 15 | 2  | 7  | 103.5  | 325.875 | 5.7   |
| 61 | 48.85  | 0  | 47 | 27 | 20 | 11 | 6 | 2 | 26 | 46 | 42 | 42 | 0 | 6 | 1  | 81.494  | 26.16 | 7 | 8 | 15 | 3  | 8  | 103.5  | 343.171 | 5.755 |
| 62 | 45.756 | 0  | 44 | 26 | 18 | 10 | 6 | 2 | 25 | 43 | 39 | 39 | 0 | 6 | 1  | 76.704  | 25.16 | 7 | 8 | 15 | 3  | 7  | 114.5  | 325.875 | 5.7   |
| 63 | 48.85  | 0  | 47 | 27 | 20 | 11 | 6 | 2 | 26 | 46 | 42 | 42 | 0 | 8 | 0  | 81.494  | 26.16 | 7 | 8 | 15 | 2  | 8  | 103.5  | 343.171 | 5.755 |
| 64 | 48.048 | 0  | 46 | 26 | 20 | 11 | 5 | 2 | 25 | 45 | 41 | 41 | 0 | 6 | 2  | 79.909  | 25.15 | 6 | 7 | 15 | 4  | 7  | 94.27  | 334.38  | 5.7   |

|    |        |    |    |    |    |    |   |   |    |    |    |    |   |   |   |        |       |   |   |    |    |    |        |         |       |
|----|--------|----|----|----|----|----|---|---|----|----|----|----|---|---|---|--------|-------|---|---|----|----|----|--------|---------|-------|
| 65 | 47.246 | 0  | 45 | 25 | 20 | 11 | 4 | 2 | 24 | 44 | 40 | 40 | 0 | 4 | 4 | 78.324 | 24.14 | 5 | 6 | 15 | 3  | 6  | 85.04  | 325.59  | 5.644 |
| 66 | 51.141 | 0  | 49 | 27 | 22 | 12 | 5 | 2 | 26 | 48 | 44 | 44 | 0 | 4 | 4 | 84.526 | 26.15 | 6 | 7 | 15 | 3  | 8  | 94.27  | 351.676 | 5.755 |
| 67 | 48.048 | 0  | 46 | 26 | 20 | 11 | 5 | 2 | 25 | 45 | 41 | 41 | 0 | 4 | 3 | 79.909 | 25.15 | 6 | 7 | 15 | 2  | 7  | 94.27  | 334.38  | 5.7   |
| 68 | 50.339 | 0  | 48 | 26 | 22 | 12 | 4 | 2 | 25 | 47 | 43 | 43 | 0 | 4 | 5 | 82.941 | 25.14 | 5 | 6 | 15 | 4  | 7  | 85.04  | 342.886 | 5.7   |
| 69 | 48.048 | 0  | 46 | 26 | 20 | 11 | 5 | 2 | 25 | 45 | 41 | 41 | 0 | 4 | 3 | 79.659 | 25.15 | 6 | 7 | 15 | 0  | 7  | 94.27  | 334.38  | 5.7   |
| 70 | 48.048 | 0  | 46 | 26 | 20 | 11 | 5 | 2 | 25 | 45 | 41 | 41 | 0 | 4 | 4 | 79.736 | 25.15 | 6 | 7 | 15 | 3  | 7  | 105.27 | 334.38  | 5.7   |
| 71 | 51.141 | 0  | 49 | 27 | 22 | 12 | 5 | 2 | 26 | 48 | 44 | 44 | 0 | 6 | 3 | 84.526 | 26.15 | 6 | 7 | 15 | 2  | 8  | 94.27  | 351.676 | 5.755 |
| 72 | 44.954 | 0  | 43 | 25 | 18 | 10 | 5 | 2 | 24 | 42 | 38 | 38 | 0 | 4 | 3 | 75.119 | 24.15 | 6 | 7 | 15 | 2  | 6  | 105.27 | 317.084 | 5.644 |
| 73 | 43.252 | 0  | 40 | 25 | 15 | 10 | 4 | 2 | 24 | 39 | 34 | 34 | 0 | 3 | 3 | 75.164 | 24.15 | 6 | 7 | 15 | 2  | 5  | 108.83 | 314.018 | 5.644 |
| 74 | 33.258 | 0  | 32 | 12 | 20 | 9  | 1 | 0 | 11 | 31 | 31 | 31 | 0 | 4 | 3 | 46.262 | 11.03 | 1 | 2 | 4  | 0  | 3  | 9.23   | 195.418 | 4.585 |
| 75 | 36.351 | 0  | 35 | 13 | 22 | 10 | 1 | 0 | 12 | 34 | 34 | 34 | 0 | 4 | 4 | 51.129 | 12.03 | 1 | 2 | 5  | 3  | 4  | 9.23   | 212.714 | 4.7   |
| 76 | 33.334 | 0  | 29 | 11 | 18 | 8  | 1 | 0 | 10 | 28 | 28 | 28 | 0 | 4 | 3 | 41.722 | 10.03 | 1 | 2 | 3  | 2  | 2  | 20.23  | 188.188 | 4.459 |
| 77 | 34.642 | 6  | 31 | 13 | 18 | 11 | 0 | 0 | 12 | 30 | 30 | 24 | 3 | 2 | 4 | 54.022 | 12.02 | 0 | 1 | 6  | 6  | 5  | 3.88   | 202.411 | 4.7   |
| 78 | 36.158 | 6  | 31 | 24 | 7  | 9  | 4 | 2 | 23 | 30 | 25 | 19 | 3 | 1 | 0 | 67.165 | 23.15 | 6 | 7 | 15 | 2  | 5  | 112.71 | 277.913 | 5.585 |
| 79 | 21.368 | 6  | 17 | 10 | 7  | 7  | 0 | 0 | 9  | 16 | 15 | 9  | 3 | 1 | 0 | 33.768 | 9.03  | 1 | 2 | 3  | 2  | 1  | 27.67  | 138.951 | 4.322 |
| 80 | 36.419 | 0  | 34 | 12 | 22 | 10 | 0 | 0 | 11 | 33 | 33 | 33 | 0 | 4 | 5 | 49.544 | 11.02 | 0 | 1 | 4  | 4  | 3  | 0      | 207.997 | 4.585 |
| 81 | 47.023 | 5  | 44 | 17 | 27 | 14 | 0 | 0 | 16 | 43 | 43 | 38 | 0 | 2 | 8 | 72.502 | 16.03 | 1 | 2 | 10 | 10 | 9  | 8.81   | 267.932 | 5.087 |
| 82 | 34.649 | 5  | 32 | 13 | 19 | 10 | 0 | 0 | 12 | 31 | 31 | 26 | 0 | 2 | 4 | 54.034 | 12.03 | 1 | 2 | 6  | 6  | 5  | 8.81   | 198.748 | 4.7   |
| 83 | 22.275 | 5  | 20 | 9  | 11 | 6  | 0 | 0 | 8  | 19 | 19 | 14 | 0 | 2 | 0 | 35.566 | 8.03  | 1 | 2 | 1  | 0  | 1  | 8.81   | 129.564 | 4.17  |
| 84 | 47.008 | 5  | 45 | 20 | 25 | 13 | 0 | 0 | 19 | 44 | 44 | 39 | 0 | 2 | 7 | 78.071 | 19.07 | 1 | 2 | 9  | 9  | 8  | 8.81   | 298.21  | 5.322 |
| 85 | 34.633 | 5  | 33 | 16 | 17 | 9  | 0 | 0 | 15 | 32 | 32 | 27 | 0 | 2 | 3 | 59.603 | 15.07 | 1 | 2 | 5  | 5  | 4  | 8.81   | 229.026 | 5     |
| 86 | 34.633 | 5  | 33 | 16 | 17 | 9  | 0 | 0 | 15 | 32 | 32 | 27 | 0 | 4 | 2 | 59.679 | 15.07 | 1 | 2 | 5  | 4  | 4  | 8.81   | 229.026 | 5     |
| 87 | 35.019 | 5  | 33 | 18 | 15 | 9  | 3 | 1 | 17 | 32 | 30 | 25 | 0 | 2 | 2 | 53.692 | 17.09 | 4 | 5 | 8  | 4  | 4  | 74.39  | 229.323 | 5.17  |
| 88 | 49.439 | 5  | 46 | 27 | 19 | 12 | 4 | 2 | 26 | 45 | 41 | 36 | 0 | 2 | 4 | 87.431 | 26.15 | 6 | 7 | 15 | 6  | 9  | 93.85  | 337.71  | 5.755 |
| 89 | 34.244 | 5  | 34 | 19 | 15 | 10 | 0 | 0 | 18 | 33 | 33 | 28 | 0 | 2 | 2 | 60.269 | 18.09 | 2 | 3 | 9  | 4  | 5  | 8.81   | 230.939 | 5.248 |
| 90 | 29.963 | 5  | 28 | 14 | 14 | 7  | 4 | 1 | 13 | 27 | 25 | 20 | 0 | 2 | 0 | 45.412 | 13.07 | 5 | 6 | 6  | 0  | 2  | 83.62  | 185.319 | 4.807 |
| 91 | 43.923 | 6  | 40 | 16 | 24 | 14 | 0 | 0 | 15 | 39 | 39 | 33 | 2 | 3 | 6 | 66.896 | 15.02 | 0 | 1 | 8  | 8  | 7  | 3.88   | 254.299 | 5     |
| 92 | 22.268 | 6  | 19 | 9  | 10 | 7  | 0 | 0 | 8  | 18 | 18 | 12 | 3 | 2 | 0 | 35.554 | 8.02  | 0 | 1 | 1  | 0  | 1  | 3.88   | 133.227 | 4.17  |
| 93 | 28.462 | 0  | 26 | 11 | 15 | 8  | 0 | 0 | 10 | 25 | 24 | 24 | 0 | 3 | 3 | 41.767 | 10.03 | 1 | 2 | 3  | 2  | 1  | 23.79  | 175.056 | 4.459 |
| 94 | 59.391 | 6  | 55 | 21 | 34 | 19 | 0 | 0 | 20 | 54 | 54 | 48 | 5 | 3 | 8 | 88.975 | 20.02 | 0 | 1 | 14 | 10 | 11 | 0      | 340.779 | 5.392 |
| 95 | 46.094 | 11 | 41 | 21 | 20 | 15 | 0 | 0 | 21 | 41 | 41 | 30 | 7 | 2 | 4 | 81.714 | 21.06 | 0 | 1 | 6  | 6  | 5  | 3.88   | 290.639 | 5.392 |
| 96 | 40.96  | 0  | 38 | 25 | 13 | 9  | 5 | 2 | 24 | 37 | 32 | 32 | 0 | 5 | 0 | 72.132 | 24.16 | 7 | 8 | 15 | 2  | 5  | 118.06 | 305.512 | 5.644 |
| 97 | 44.054 | 5  | 41 | 26 | 15 | 10 | 5 | 2 | 25 | 40 | 36 | 31 | 0 | 2 | 1 | 78.741 | 25.16 | 7 | 8 | 15 | 3  | 8  | 103.08 | 311.908 | 5.7   |
| 98 | 40.158 | 0  | 37 | 24 | 13 | 9  | 4 | 2 | 23 | 36 | 31 | 31 | 0 | 3 | 2 | 70.547 | 23.15 | 6 | 7 | 15 | 2  | 5  | 108.83 | 296.722 | 5.585 |

|     |        |   |    |    |    |    |   |   |    |    |    |    |   |   |   |        |       |   |   |   |   |   |      |        |       |
|-----|--------|---|----|----|----|----|---|---|----|----|----|----|---|---|---|--------|-------|---|---|---|---|---|------|--------|-------|
| 99  | 38.643 | 0 | 37 | 13 | 24 | 11 | 0 | 0 | 12 | 36 | 36 | 36 | 0 | 4 | 6 | 54.161 | 12.02 | 0 | 1 | 6 | 6 | 5 | 0    | 221.22 | 4.7   |
| 100 | 31.54  | 5 | 30 | 15 | 15 | 8  | 0 | 0 | 14 | 29 | 29 | 24 | 0 | 2 | 2 | 54.986 | 14.07 | 1 | 2 | 5 | 4 | 3 | 8.81 | 211.73 | 4.907 |

Table S3. Values of Crippen and Mannhold LogP

| Sample | CrippenLogP | MannholdLogP |
|--------|-------------|--------------|
| 1      | 1.283       | 2.450        |
| 2      | -0.278      | 2.010        |
| 3      | 1.961       | 3.330        |
| 4      | 0.112       | 2.120        |
| 5      | 0.892       | 2.340        |
| 6      | 1.673       | 2.560        |
| 7      | -0.278      | 2.010        |
| 8      | 0.985       | 2.340        |
| 9      | -0.278      | 2.010        |
| 10     | 5.281       | 1.900        |
| 11     | 3.238       | 1.350        |
| 12     | 5.579       | 2.010        |
| 13     | 3.628       | 1.460        |
| 14     | -0.150      | 2.340        |
| 15     | -0.594      | 2.450        |
| 16     | 4.826       | 1.900        |
| 17     | 3.674       | 1.900        |
| 18     | -1.369      | 1.790        |
| 19     | 0.928       | 1.900        |
| 20     | 2.158       | 1.900        |
| 21     | 2.303       | 1.240        |
| 22     | 5.939       | 0.910        |
| 23     | 7.499       | 1.350        |
| 24     | 1.470       | 1.570        |
| 25     | 1.413       | 1.570        |
| 26     | 4.274       | 1.790        |
| 27     | 0.007       | 2.340        |



|    |        |       |
|----|--------|-------|
| 28 | -0.189 | 2.450 |
| 29 | 0.591  | 2.670 |
| 30 | 6.028  | 1.350 |
| 31 | 2.381  | 1.900 |
| 32 | -0.022 | 2.230 |
| 33 | 4.303  | 1.900 |
| 34 | 3.340  | 1.680 |
| 35 | 4.120  | 1.900 |
| 36 | -0.022 | 2.230 |
| 37 | 0.787  | 2.560 |
| 38 | 0.787  | 2.560 |
| 39 | 5.083  | 2.120 |
| 40 | -3.030 | 1.900 |
| 41 | -1.112 | 2.010 |
| 42 | 4.303  | 1.900 |
| 43 | 5.863  | 2.340 |
| 44 | 4.331  | 2.010 |
| 45 | 6.585  | 1.240 |
| 46 | 5.805  | 1.020 |
| 47 | 0.369  | 2.340 |
| 48 | 0.007  | 2.340 |
| 49 | -1.972 | 2.010 |
| 50 | 4.245  | 0.910 |
| 51 | 4.232  | 1.020 |
| 52 | 4.220  | 1.020 |
| 53 | -1.343 | 2.230 |
| 54 | 4.232  | 1.020 |
| 55 | 3.629  | 3.770 |
| 56 | 5.428  | 2.230 |
| 57 | 1.132  | 2.670 |
| 58 | 1.616  | 2.340 |
| 59 | 3.678  | 0.800 |
| 60 | 3.331  | 0.800 |
| 61 | 3.721  | 0.910 |

|    |        |       |
|----|--------|-------|
| 62 | 3.067  | 0.800 |
| 63 | 3.721  | 0.910 |
| 64 | 4.484  | 1.020 |
| 65 | 5.248  | 1.130 |
| 66 | 4.874  | 1.130 |
| 67 | 4.484  | 1.020 |
| 68 | 5.638  | 1.240 |
| 69 | 4.832  | 1.020 |
| 70 | 4.220  | 1.020 |
| 71 | 4.874  | 1.130 |
| 72 | 3.830  | 0.910 |
| 73 | 4.428  | 0.910 |
| 74 | -1.385 | 2.120 |
| 75 | -1.343 | 2.230 |
| 76 | -2.387 | 2.010 |
| 77 | 0.759  | 2.450 |
| 78 | 3.785  | 0.800 |
| 79 | -2.432 | 1.900 |
| 80 | -0.579 | 2.340 |
| 81 | 2.063  | 2.670 |
| 82 | 0.502  | 2.230 |
| 83 | -1.058 | 1.790 |
| 84 | 5.969  | 2.120 |
| 85 | 4.408  | 1.680 |
| 86 | 4.501  | 1.680 |
| 87 | 3.083  | 1.460 |
| 88 | 6.719  | 1.130 |
| 89 | 5.118  | 1.570 |
| 90 | 1.345  | 1.460 |
| 91 | 1.567  | 2.780 |
| 92 | -0.802 | 2.010 |
| 93 | -1.789 | 2.010 |
| 94 | 2.068  | 3.330 |
| 95 | 6.208  | 2.450 |

|     |        |       |
|-----|--------|-------|
| 96  | 3.274  | 0.690 |
| 97  | 4.770  | 0.800 |
| 98  | 4.037  | 0.800 |
| 99  | -0.189 | 2.450 |
| 100 | 4.018  | 1.570 |

Table S4. Observed and predicted activities for Models 1, 2 and 3 in the external validation

| Samples | LogEC <sub>50</sub><br>measured | Predicted Model | Residual Model | Predicted Model | Residual Model | Predicted Model | Residual Model |
|---------|---------------------------------|-----------------|----------------|-----------------|----------------|-----------------|----------------|
|         |                                 | 1               | 1              | 2               | 2              | 3               | 3              |
| 81      | 1.340                           | 1.662           | -0.322         | 1.647           | -0.307         | 2.586           | -1.246         |
| 82      | 2.820                           | 2.813           | 0.007          | 2.784           | 0.036          | 2.536           | 0.284          |
| 83      | 3.860                           | 4.394           | -0.534         | 4.242           | -0.382         | 2.463           | 1.397          |
| 84      | 1.650                           | 1.790           | -0.140         | 1.522           | 0.128          | 3.045           | -1.395         |
| 85      | 3.090                           | 2.960           | 0.130          | 2.659           | 0.431          | 3.007           | 0.083          |
| 86      | 3.260                           | 3.110           | 0.150          | 2.814           | 0.446          | 3.007           | 0.253          |
| 87      | 3.000                           | 3.364           | -0.364         | 3.326           | -0.326         | 3.244           | -0.244         |
| 88      | 2.240                           | 2.566           | -0.326         | 2.527           | -0.287         | 3.707           | -1.467         |
| 89      | 2.180                           | 2.808           | -0.628         | 2.741           | -0.561         | 3.253           | -1.073         |
| 90      | 4.200                           | 4.516           | -0.316         | 4.362           | -0.162         | 2.982           | 1.218          |
| 91      | 2.970                           | 1.998           | 0.972          | 2.131           | 0.839          | 2.886           | 0.084          |
| 92      | 4.220                           | 4.139           | 0.081          | 4.258           | -0.038         | 2.650           | 1.570          |
| 93      | 4.580                           | 4.071           | 0.509          | 3.803           | 0.777          | 1.898           | 2.682          |
| 94      | 0.650                           | 1.162           | -0.512         | 1.283           | -0.633         | 3.057           | -2.407         |
| 95      | 1.070                           | 1.894           | -0.824         | 2.086           | -1.016         | 4.703           | -3.633         |
| 96      | 3.530                           | 3.991           | -0.461         | 3.805           | -0.275         | 3.074           | 0.456          |
| 97      | 3.340                           | 3.320           | 0.020          | 3.416           | -0.076         | 3.685           | -0.345         |
| 98      | 3.810                           | 3.934           | -0.124         | 3.670           | 0.140          | 2.960           | 0.850          |
| 99      | 1.630                           | 2.798           | -1.168         | 2.663           | -1.033         | 1.698           | -0.068         |
| 100     | 3.110                           | 3.271           | -0.161         | 2.944           | 0.166          | 2.995           | 0.115          |

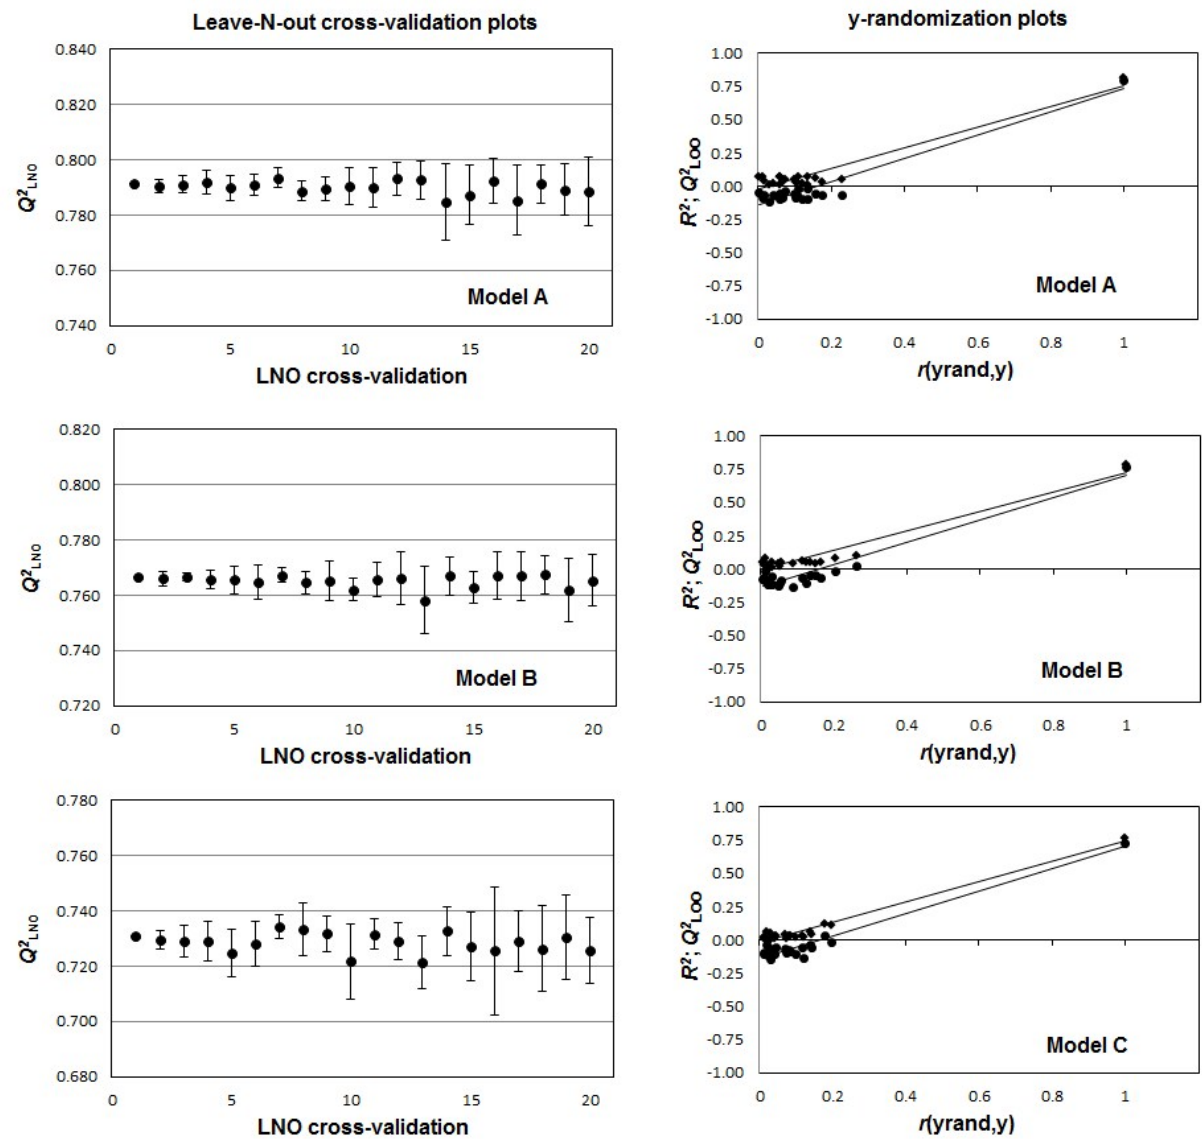

Fig. S1. Leave-N-out cross-validation and y-randomization plots for the three models. The bars represent the standard deviations.
